# Supplementary material for: Real-time synthesis of imagined speech processes from minimally invasive recordings of neural activity
Source: PubMed Central journal article supplement (PMC8460739; doi:10.1038/s42003-021-02578-0), 2021-09-23
Supplement: 42003_2021_2578_MOESM2_ESM.pdf [file 42003_2021_2578_MOESM2_ESM.pdf]

## Description of Additional Supplementary Files

**File Name:** Supplementary Video 1

**Description:** This study is accompanied by a video of the patient during the experiment, which showcases examples of synthesized audio for all three communication modalities. For each modality, we present the ongoing high-gamma activity as changing color intensities at the corresponding electrodes in a brain model, in conjunction with the decoded spectrogram and waveform results, synchronized with the synthesized audio playback. The target word for each trial is indicated as the label on the x-Axis of the timeline
